# Supplementary material for: Nudix hydrolase 14 influences plant development and grain chalkiness in rice
Source: Front Plant Sci. 2022 Dec 8;13:1054917. doi: 10.3389/fpls.2022.1054917 (PMC9773146; doi:10.3389/fpls.2022.1054917)
Supplement: Supplementary file 2 [file Table_1.xlsx]

## Sheet: Sheet1
Supplementary Table 3.The information of DEGs in carbohydrate catabolic process and chitin metabolic process.
	NIP-1_fpkm	NIP-2_fpkm	NIP-3_fpkm	nd14-1_fpkm	nd14-2_fpkm	nd14-3_fpkm	NIP-1_count	NIP-2_count	NIP-3_count	nd14-1_count	nd14-2_count	nd14-3_count	log2FoldChange	pvalue	padj	regulated	chr	start	end	strand	gene_name	gene_description	KEGG	KEGG pathway	NR	Swissprot	KOG	GO	Pfam	TF-Family	TF-Category	TF-Classification
Os01g0660200	696.04	513.58	654.3	177.36	140.77	144.08	15069	10870	13742	3848	2802	2899	-2.00198	1.30201e-72	2.91259e-69	down	1	26885484	26886719	+	gene:Os01g0660200	gene:Os01g0660200	K01183 chitinase [EC:3.2.1.14] | (RefSeq) acidic endochitinase (A)	ko00520: Amino sugar and nucleotide sugar metabolism; ko01100: Metabolic pathways	XP_015622676.1	CHIT3_VITVI RecName: Full=Acidic endochitinase; EC=3.2.1.14; Flags: Precursor;	At5g24090	GO:0004568,chitinase activity; GO:0006032,chitin catabolic process; GO:0000272,polysaccharide catabolic process; GO:0003674,molecular_function; GO:0003824,catalytic activity; GO:0004553,hydrolase activity, hydrolyzing O-glycosyl compounds; GO:0016787,hydrolase activity; GO:0016798,hydrolase activity, acting on glycosyl bonds; GO:0008152,metabolic process; GO:0006022,aminoglycan metabolic process;…	PF00704.28:Glycosyl hydrolases family 18	--	--	--
Os01g0687400	175.65	145.8	165.58	70.9	66.7	66.61	3649	2961	3337	1476	1274	1286	-1.24594	9.45632e-46	4.91949e-43	down	1	28354882	28356067	-	gene:Os01g0687400	Similar to Chitinase (EC 3.2.1.14)	K01183 chitinase [EC:3.2.1.14] | (RefSeq) acidic endochitinase (A)	ko00520: Amino sugar and nucleotide sugar metabolism; ko01100: Metabolic pathways	XP_015627500.1	CHIA_CICAR RecName: Full=Acidic endochitinase; EC=3.2.1.14; Flags: Precursor;	At5g24090	GO:0005615,extracellular space; GO:0004568,chitinase activity; GO:0006032,chitin catabolic process; GO:0000272,polysaccharide catabolic process; GO:0003674,molecular_function; GO:0003824,catalytic activity; GO:0004553,hydrolase activity, hydrolyzing O-glycosyl compounds; GO:0016787,hydrolase activity; GO:0016798,hydrolase activity, acting on glycosyl bonds; GO:0008152,metabolic process; GO:000602…	PF00704.28:Glycosyl hydrolases family 18	--	--	--
Os11g0455500	652.38	488.42	594.63	244.83	268.02	238.99	21494	15732	19006	8084	8119	7318	-1.19905	9.93904e-37	3.08801e-34	down	11	15420139	15422972	-	gene:Os11g0455500	Similar to Adenosylhomocysteinase	K01251 adenosylhomocysteinase [EC:3.3.1.1] | (RAP-DB) Os11g0455500; Similar to Adenosylhomocysteinase. (A)	ko00270: Cysteine and methionine metabolism; ko01100: Metabolic pathways	BAT13921.1	SAHH_WHEAT RecName: Full=Adenosylhomocysteinase; Short=AdoHcyase; EC=3.3.1.1; AltName: Full=S-adenosyl-L-homocysteine hydrolase;	At4g13940	GO:0004013,adenosylhomocysteinase activity; GO:0051287,NAD binding; GO:0006730,one-carbon metabolic process; GO:0019510,S-adenosylhomocysteine catabolic process; GO:0003674,molecular_function; GO:0003824,catalytic activity; GO:0016787,hydrolase activity; GO:0016801,hydrolase activity, acting on ether bonds; GO:0016802,trialkylsulfonium hydrolase activity; GO:0000166,nucleotide binding; GO:0005488…	PF05221.17:S-adenosyl-L-homocysteine hydrolase	--	--	--
Os10g0416100	117.58	92.04	99.56	45.76	39.26	40.66	2492	1907	2047	972	765	801	-1.29032	4.21464e-34	1.0963e-31	down	10	14558964	14560173	+	gene:Os10g0416100	gene:Os10g0416100	--	--	XP_015614626.1	CHIT2_TULBA RecName: Full=Chitinase 2; EC=3.2.1.14; AltName: Full=Tulip bulb chitinase-2; Short=TBC-2;	--	GO:0008061,chitin binding; GO:0004568,chitinase activity; GO:0006032,chitin catabolic process; GO:0000272,polysaccharide catabolic process; GO:0003674,molecular_function; GO:0005488,binding; GO:0008144,drug binding; GO:0097367,carbohydrate derivative binding; GO:0003824,catalytic activity; GO:0004553,hydrolase activity, hydrolyzing O-glycosyl compounds; GO:0016787,hydrolase activity; GO:0016798,h…	PF00704.28:Glycosyl hydrolases family 18	--	--	--
Os08g0518800	25.43	28.14	23.01	7.34	11.38	8.75	294	318	258	85	121	94	-1.47785	2.91463e-16	1.80111e-14	down	8	25758874	25759533	-	gene:Os08g0518800	gene:Os08g0518800	K01183 chitinase [EC:3.2.1.14] | (RefSeq) xylanase inhibitor protein 2-like (A)	ko00520: Amino sugar and nucleotide sugar metabolism; ko01100: Metabolic pathways	BAF24168.1	XIP2_ORYSJ RecName: Full=Xylanase inhibitor protein 2; AltName: Full=Class III chitinase homolog h; Flags: Precursor;	At5g24090	GO:0005576,extracellular region; GO:0008061,chitin binding; GO:0004568,chitinase activity; GO:0005975,carbohydrate metabolic process; GO:0006032,chitin catabolic process; GO:0006952,defense response; GO:0003674,molecular_function; GO:0005488,binding; GO:0008144,drug binding; GO:0097367,carbohydrate derivative binding; GO:0003824,catalytic activity; GO:0004553,hydrolase activity, hydrolyzing O-gly…	--	--	--	--
Os10g0542900	1209.94	926.69	897.58	293.24	460.9	349.03	22719	17011	16350	5518	7957	6091	-1.4552	6.3957e-10	1.84847e-08	down	10	21205700	21207611	+	gene:Os10g0542900	gene:Os10g0542900	K20547 basic endochitinase B [EC:3.2.1.14] | (RAP-DB) Os10g0542900, CHT8, CHITINASE_8; Similar to chitinase. (A)	ko00520: Amino sugar and nucleotide sugar metabolism; ko01100: Metabolic pathways; ko04016: MAPK signaling pathway - plant	XP_015614506.1	CHI8_ORYSJ RecName: Full=Chitinase 8; EC=3.2.1.14; AltName: Full=Class II chitinase a; Short=OsChia2a; AltName: Full=Pathogenesis related (PR)-3 chitinase 8; Flags: Precursor;	At3g12500	GO:0004568,chitinase activity; GO:0016998,cell wall macromolecule catabolic process; GO:0006032,chitin catabolic process; GO:0000272,polysaccharide catabolic process; GO:0003674,molecular_function; GO:0003824,catalytic activity; GO:0004553,hydrolase activity, hydrolyzing O-glycosyl compounds; GO:0016787,hydrolase activity; GO:0016798,hydrolase activity, acting on glycosyl bonds; GO:0008152,metabo…	PF00182.19:Chitinase class I	--	--	--
Os01g0712700	15.51	10.21	12.09	4.65	7.6	5.5	373	240	282	112	168	123	-1.08745	1.67041e-08	3.73297e-07	down	1	29605141	29606513	-	gene:Os01g0712700	CMP/dCMP deaminase%2C zinc-binding domain containing protein	K01489 cytidine deaminase [EC:3.5.4.5] | (RefSeq) cytidine deaminase 1 (A)	ko00240: Pyrimidine metabolism; ko01100: Metabolic pathways	XP_015621794.1	CDA1_ARATH RecName: Full=Cytidine deaminase 1; Short=At-CDA1; EC=3.5.4.5;	At2g19570	GO:0005829,cytosol; GO:0004126,cytidine deaminase activity; GO:0047844,deoxycytidine deaminase activity; GO:0042803,protein homodimerization activity; GO:0008270,zinc ion binding; GO:0006216,cytidine catabolic process; GO:0009972,cytidine deamination; GO:0003674,molecular_function; GO:0003824,catalytic activity; GO:0016787,hydrolase activity; GO:0016810,hydrolase activity, acting on carbon-nitrog…	PF08211.12:Cytidine and deoxycytidylate deaminase zinc-binding region	--	--	--
Os10g0416500	122.89	95.27	113.3	38.1	61.98	31.95	2301	1744	2058	715	1067	556	-1.32187	2.01649e-05	0.000237416	down	10	14590045	14591113	+	gene:Os10g0416500	gene:Os10g0416500	--	--	XP_015612977.1	CHIT1_TULBA RecName: Full=Chitinase 1; EC=3.2.1.14; AltName: Full=Tulip bulb chitinase-1; Short=TBC-1; Flags: Precursor;	--	GO:0008061,chitin binding; GO:0004568,chitinase activity; GO:0006032,chitin catabolic process; GO:0000272,polysaccharide catabolic process; GO:0003674,molecular_function; GO:0005488,binding; GO:0008144,drug binding; GO:0097367,carbohydrate derivative binding; GO:0003824,catalytic activity; GO:0004553,hydrolase activity, hydrolyzing O-glycosyl compounds; GO:0016787,hydrolase activity; GO:0016798,h…	PF00704.28:Glycosyl hydrolases family 18	--	--	--
novel.1162	6.32	3.31	3.56	1.76	1.52	1.9	86	44	47	24	19	24	-1.34253	0.000178475	0.00160248	down	4	24672421	24673197	-	--	--	K01183 chitinase [EC:3.2.1.14] | (RefSeq) chitinase 5 (A)	ko00520: Amino sugar and nucleotide sugar metabolism; ko01100: Metabolic pathways	XP_003580049.1	CHI5_ORYSJ RecName: Full=Chitinase 5; EC=3.2.1.14; AltName: Full=Class IV chitinase a; Short=OsChia4a; AltName: Full=Pathogenesis related (PR)-3 chitinase 5; Flags: Precursor;	At2g43570	GO:0008061,chitin binding; GO:0004568,chitinase activity; GO:0016998,cell wall macromolecule catabolic process; GO:0006032,chitin catabolic process; GO:0006952,defense response; GO:0000272,polysaccharide catabolic process; GO:0003674,molecular_function; GO:0005488,binding; GO:0008144,drug binding; GO:0097367,carbohydrate derivative binding; GO:0003824,catalytic activity; GO:0004553,hydrolase acti…	PF00187.19:Chitin recognition protein	--	--	--
Os11g0702100	10.57	6	6.35	0.98	3.35	1.42	216	120	126	20	63	27	-1.99537	0.00041892	0.00333022	down	11	28758837	28760003	-	gene:Os11g0702100	Similar to Class III chitinase homologu	K01183 chitinase [EC:3.2.1.14] | (RefSeq) xylanase inhibitor protein 1-like (A)	ko00520: Amino sugar and nucleotide sugar metabolism; ko01100: Metabolic pathways	XP_015615648.1	XIP1_ORYSJ RecName: Full=Xylanase inhibitor protein 1; AltName: Full=Class III chitinase homolog a; AltName: Full=RIXI protein; Flags: Precursor;	At5g24090	GO:0005576,extracellular region; GO:0008061,chitin binding; GO:0004568,chitinase activity; GO:0005975,carbohydrate metabolic process; GO:0006032,chitin catabolic process; GO:0006952,defense response; GO:0003674,molecular_function; GO:0005488,binding; GO:0008144,drug binding; GO:0097367,carbohydrate derivative binding; GO:0003824,catalytic activity; GO:0004553,hydrolase activity, hydrolyzing O-gly…	PF00704.28:Glycosyl hydrolases family 18	--	--	--
Os06g0726200	111.46	100.34	87.96	27.29	65.67	30.49	2376	2091	1819	583	1287	604	-1.2779	0.00189218	0.0119875	down	6	30890834	30892050	+	gene:Os06g0726200	gene:Os06g0726200	K20547 basic endochitinase B [EC:3.2.1.14] | (RefSeq) chitinase 1 (A)	ko00520: Amino sugar and nucleotide sugar metabolism; ko01100: Metabolic pathways; ko04016: MAPK signaling pathway - plant	Q42993.1	CHI1_ORYSJ RecName: Full=Chitinase 1; EC=3.2.1.14; AltName: Full=Class I chitinase a; Short=OsChia1a; AltName: Full=Pathogenesis related (PR)-3 chitinase 1; Flags: Precursor;	At3g12500	GO:0008061,chitin binding; GO:0004568,chitinase activity; GO:0016998,cell wall macromolecule catabolic process; GO:0006032,chitin catabolic process; GO:0050832,defense response to fungus; GO:0000272,polysaccharide catabolic process; GO:0003674,molecular_function; GO:0005488,binding; GO:0008144,drug binding; GO:0097367,carbohydrate derivative binding; GO:0003824,catalytic activity; GO:0004553,hydr…	PF00182.19:Chitinase class I	--	--	--
Os08g0518900	1.04	1.32	0.47	0.13	0.18	0.45	25	31	11	3	4	10	-1.91947	0.00246226	0.0148666	down	8	25762457	25763823	+	gene:Os08g0518900	gene:Os08g0518900	K01183 chitinase [EC:3.2.1.14] | (RefSeq) xylanase inhibitor protein 1-like (A)	ko00520: Amino sugar and nucleotide sugar metabolism; ko01100: Metabolic pathways	XP_015648170.1	XIP1_ORYSJ RecName: Full=Xylanase inhibitor protein 1; AltName: Full=Class III chitinase homolog a; AltName: Full=RIXI protein; Flags: Precursor;	At5g24090	GO:0005576,extracellular region; GO:0008061,chitin binding; GO:0004568,chitinase activity; GO:0005975,carbohydrate metabolic process; GO:0006032,chitin catabolic process; GO:0006952,defense response; GO:0003674,molecular_function; GO:0005488,binding; GO:0008144,drug binding; GO:0097367,carbohydrate derivative binding; GO:0003824,catalytic activity; GO:0004553,hydrolase activity, hydrolyzing O-gly…	PF00704.28:Glycosyl hydrolases family 18	--	--	--
